# Supplementary material
Source: MDPI journal article supplement (https://www.mdpi.com/2073-4441/16/4/517)
Supplement: s1 [file s1]

Figure

Figure S1. Monthly runoff in the Yeongsan river basin during historical periods

Figure S2. Hydrographs over the validation period

Figure S3. Comparison of observed and simulated extreme runoff of above 98th percentile (Red line is simulated runoff data and black dot is observed runoff data)

Table

Table S1. SWAT parameters and their ranges selected for calibration

Table S2. Statistics of evaluation metrics in validation period

Table S3. Differences in extreme values between simulated and observed runoff using JS-D

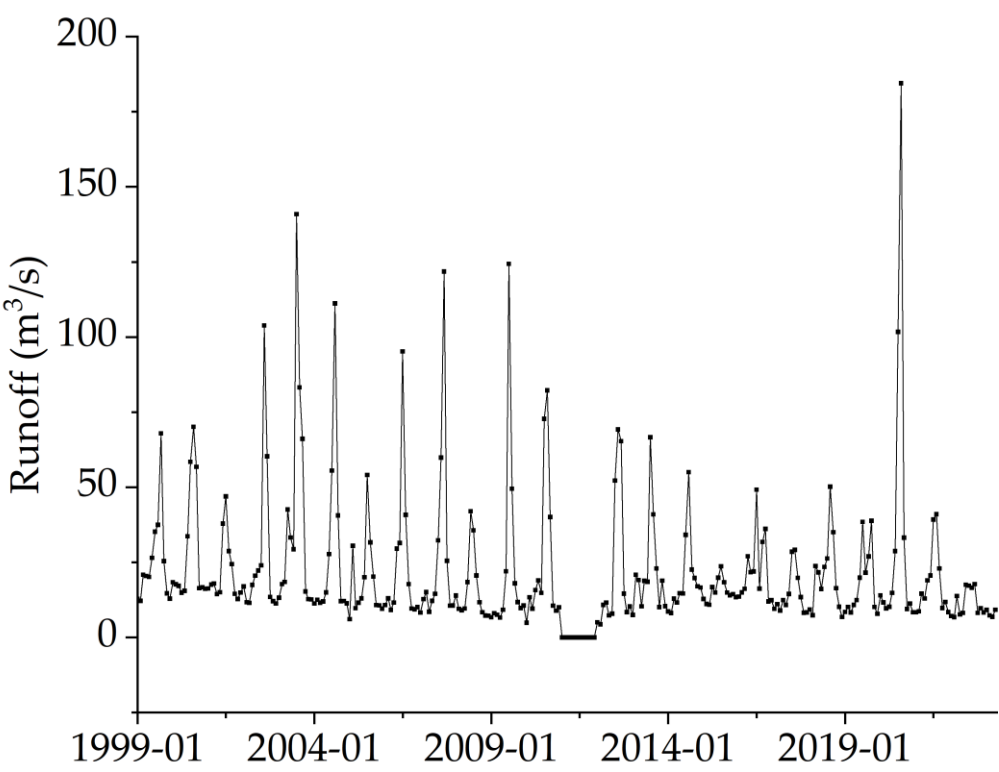

Figure S1. Monthly runoff in the Yeongsan river basin during historical periods.

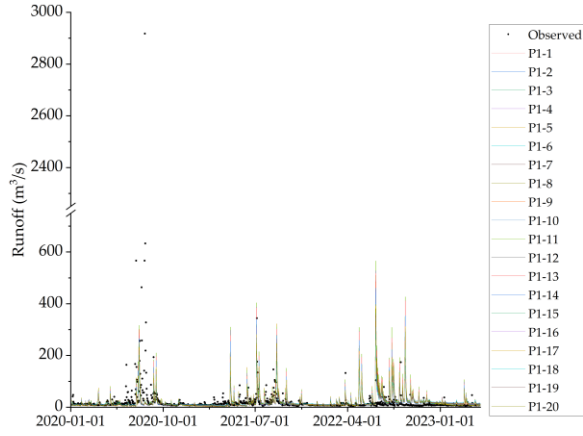

(a) P1

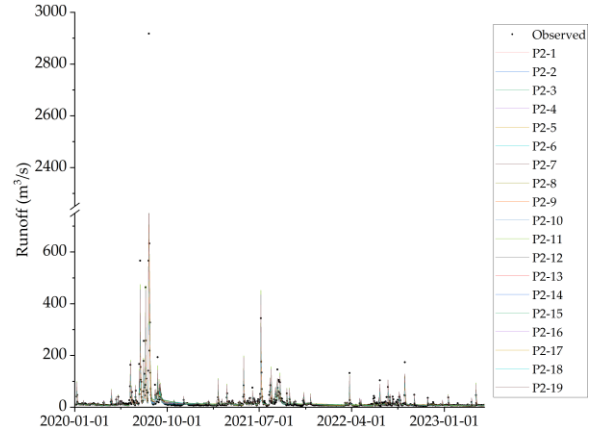

(b) P2

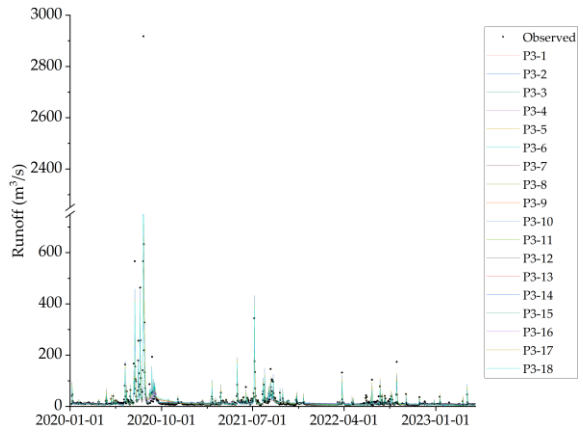

(c) P3

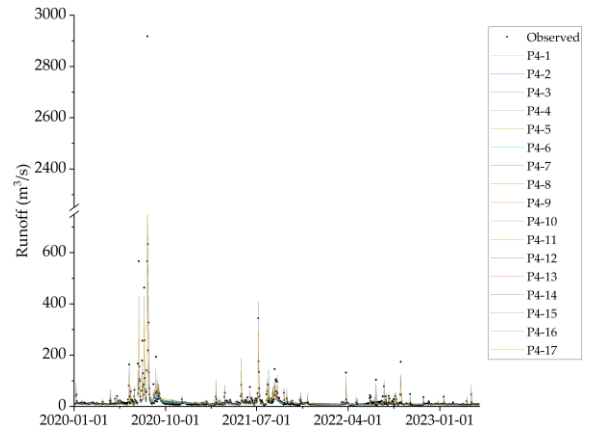

(d) P4

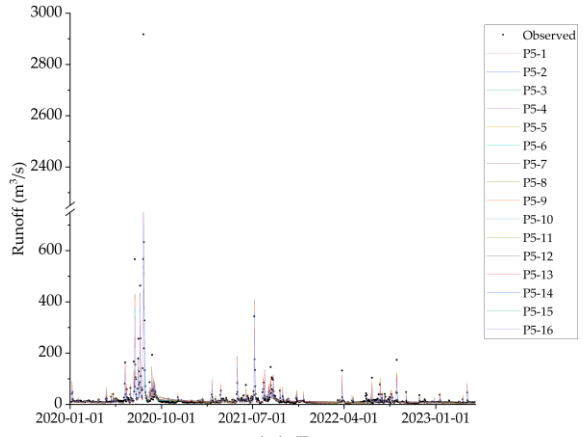

(e) P5

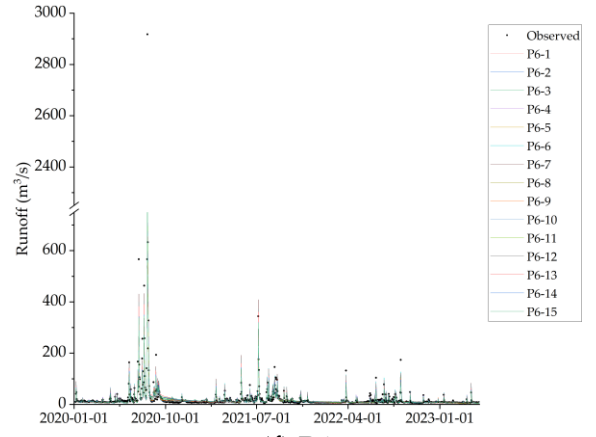

(f) P6

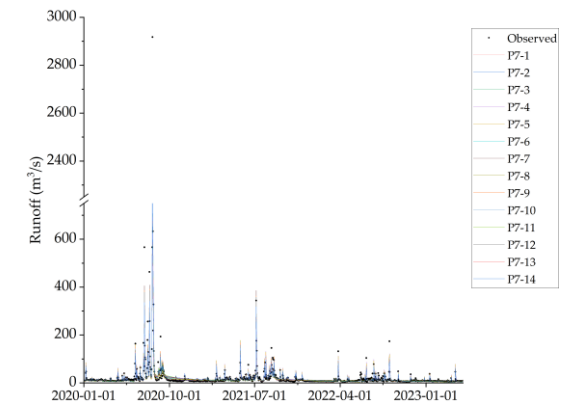

(g) P7

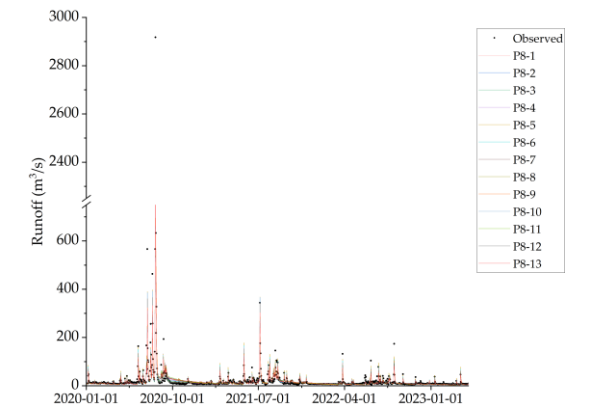

(h) P8

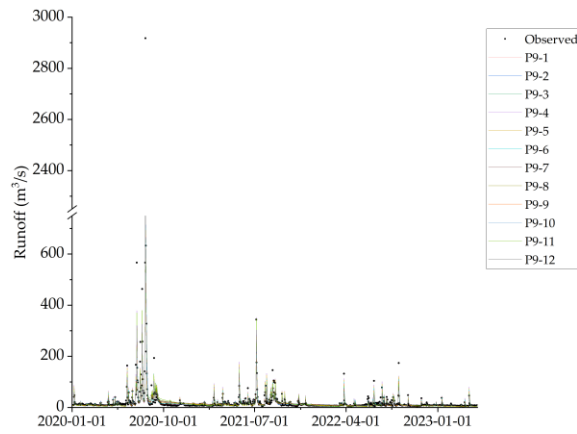

(i) P9

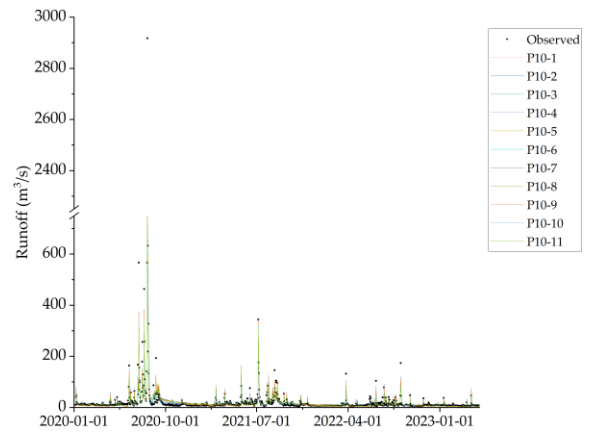

(j) P10

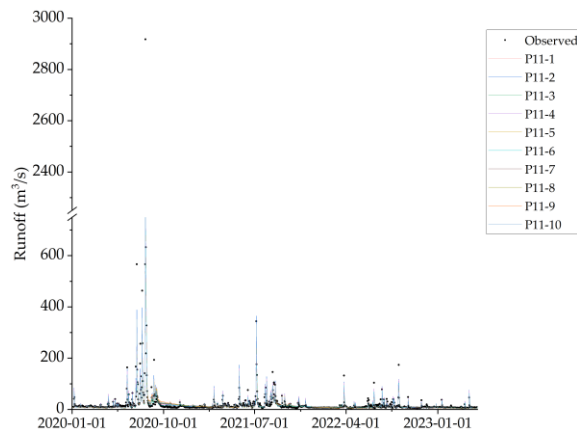

(k) P11

**Figure S2.** Hydrographs over the validation period.

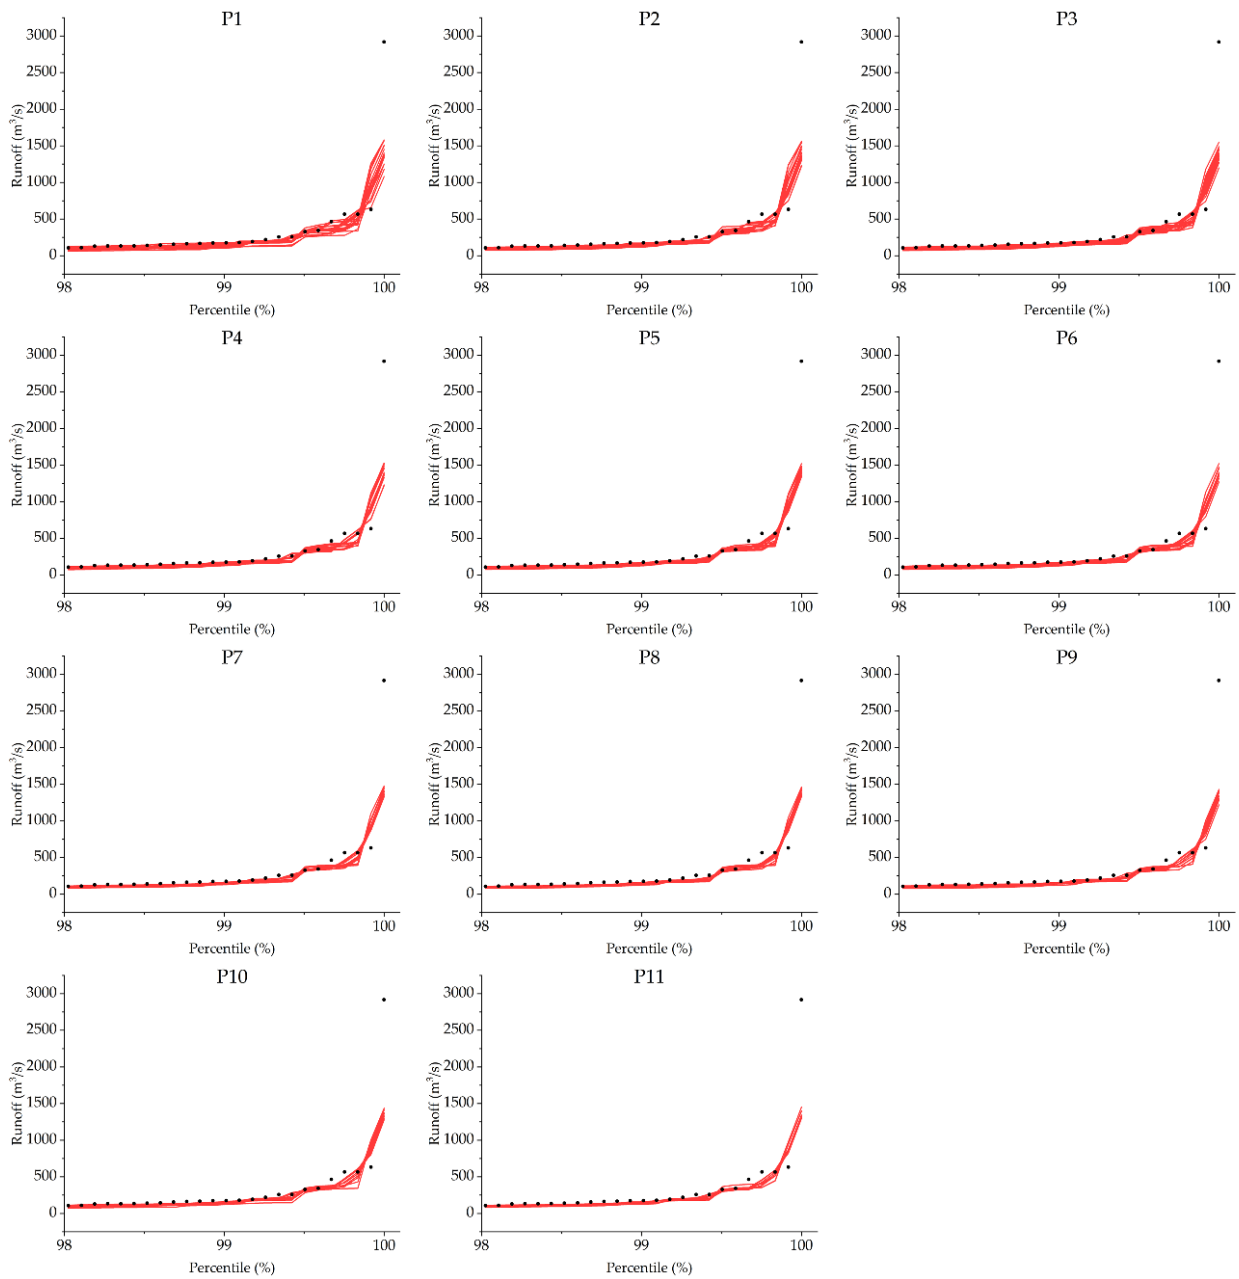

**Figure S3.** Comparison of observed and simulated extreme runoff of above 98th percentile (Red line is simulated runoff data and black dot is observed runoff data).

**Table S1.** SWAT parameters and their ranges selected for calibration.

|                          | Parameter | Description                                               | Range |      | Method   |
|--------------------------|-----------|-----------------------------------------------------------|-------|------|----------|
|                          |           |                                                           | Min   | Max  |          |
| Ground water             | ALPHA_BF  | Baseflow alpha factor                                     | 0.01  | 0.4  | Replace  |
|                          | GW_DELAY  | Groundwater delay time                                    | 50    | 450  | Absolute |
| Hydrologic response unit | ESCO      | Soil evaporation compensation factor                      | 0.5   | 0.99 | Replace  |
|                          | SURLAG    | Surface runoff lag coefficient                            | 0.1   | 10   | Replace  |
| Soil                     | SOL_K     | Saturated hydraulic conductivity                          | -0.25 | 0.25 | Relative |
| Channel routing          | CH_K2     | Effective hydraulic conductivity in main channel alluvium | 0     | 0.5  | Replace  |

|            |        |                                                              |       |      |          |
|------------|--------|--------------------------------------------------------------|-------|------|----------|
| Management | CN2    | Initial SCS runoff curve number for<br>moisture condition II | −0.25 | 0.25 | Relative |
| Basin      | SURLAG | Surface runoff lag coefficient                               | 3     | 6    | Replace  |

**Table S2.** Validation statistics of evaluation metrics of calibration periods.

| Evaluation Metrics | Criteria | P1    | P2    | P3    | P4    | P5    | P6    | P7    | P8    | P9    | P10   | P11   |
|--------------------|----------|-------|-------|-------|-------|-------|-------|-------|-------|-------|-------|-------|
| NSE                | Avg.     | 0.72  | 0.73  | 0.73  | 0.73  | 0.74  | 0.74  | 0.74  | 0.74  | 0.73  | 0.72  | 0.73  |
|                    | Median   | 0.73  | 0.73  | 0.74  | 0.73  | 0.74  | 0.74  | 0.74  | 0.74  | 0.74  | 0.72  | 0.72  |
|                    | 25%      | 0.70  | 0.72  | 0.72  | 0.73  | 0.73  | 0.73  | 0.73  | 0.73  | 0.72  | 0.71  | 0.72  |
|                    | 75%      | 0.75  | 0.74  | 0.75  | 0.75  | 0.75  | 0.75  | 0.74  | 0.75  | 0.74  | 0.74  | 0.73  |
|                    | IQR      | 0.05  | 0.02  | 0.03  | 0.02  | 0.02  | 0.02  | 0.01  | 0.02  | 0.02  | 0.03  | 0.01  |
| KGE                | Avg.     | 0.60  | 0.60  | 0.61  | 0.61  | 0.61  | 0.61  | 0.61  | 0.60  | 0.59  | 0.59  | 0.59  |
|                    | Median   | 0.59  | 0.60  | 0.62  | 0.60  | 0.61  | 0.61  | 0.61  | 0.60  | 0.60  | 0.59  | 0.59  |
|                    | 25%      | 0.56  | 0.57  | 0.58  | 0.58  | 0.59  | 0.58  | 0.60  | 0.59  | 0.58  | 0.57  | 0.57  |
|                    | 75%      | 0.65  | 0.63  | 0.63  | 0.63  | 0.63  | 0.62  | 0.63  | 0.62  | 0.61  | 0.61  | 0.60  |
|                    | IQR      | 0.09  | 0.06  | 0.05  | 0.05  | 0.04  | 0.04  | 0.03  | 0.04  | 0.03  | 0.04  | 0.03  |
| Pbias              | Avg.     | 2.85  | 2.91  | 2.78  | 3.18  | 3.30  | 2.84  | 3.17  | 4.36  | 3.40  | 4.27  | 3.74  |
|                    | Median   | −2.75 | −2.90 | −2.95 | −3.10 | −3.20 | −2.70 | −3.35 | −4.80 | −3.50 | −4.70 | −4.25 |
|                    | 25%      | −4.23 | −3.70 | −3.53 | −4.25 | −4.68 | −4.20 | −4.43 | −5.80 | −4.98 | −6.00 | −4.80 |
|                    | 75%      | −0.20 | −1.70 | −0.98 | −2.25 | −1.63 | −0.70 | −1.53 | −2.95 | −1.23 | −2.60 | −2.50 |
|                    | IQR      | 4.03  | 2.00  | 2.55  | 2.00  | 3.05  | 3.50  | 2.90  | 2.85  | 3.75  | 3.40  | 2.30  |
| NRMSE              | Avg.     | 52.52 | 52.05 | 51.55 | 51.62 | 51.08 | 51.37 | 51.16 | 51.32 | 52.17 | 52.35 | 52.33 |
|                    | Median   | 51.90 | 52.10 | 51.15 | 51.80 | 51.05 | 51.30 | 50.90 | 51.30 | 51.30 | 52.70 | 52.80 |
|                    | 25%      | 50.43 | 50.70 | 50.00 | 50.00 | 50.28 | 50.30 | 50.53 | 50.35 | 51.13 | 50.90 | 51.45 |
|                    | 75%      | 54.15 | 53.10 | 52.80 | 52.30 | 51.68 | 52.10 | 52.10 | 52.35 | 53.20 | 53.50 | 53.13 |
|                    | IQR      | 3.73  | 2.40  | 2.80  | 2.30  | 1.40  | 1.80  | 1.58  | 2.00  | 2.08  | 2.60  | 1.68  |

**Table S3.** Differences in extreme values between simulated and observed runoff using JS-D.

| Criteria | P1     | P2     | P3     | P4     | P5     | P6     | P7     | P8     | P9     | P10    | P11    |
|----------|--------|--------|--------|--------|--------|--------|--------|--------|--------|--------|--------|
| Avg.     | 0.0143 | 0.0138 | 0.0139 | 0.0139 | 0.0135 | 0.0136 | 0.0131 | 0.0137 | 0.0140 | 0.0139 | 0.0138 |
| Median   | 0.0138 | 0.0145 | 0.0136 | 0.0138 | 0.0137 | 0.0132 | 0.0132 | 0.0136 | 0.0135 | 0.0133 | 0.0135 |
| 25%      | 0.0130 | 0.0119 | 0.0125 | 0.0124 | 0.0125 | 0.0127 | 0.0125 | 0.0126 | 0.0128 | 0.0127 | 0.0120 |
| 75%      | 0.0156 | 0.0153 | 0.0157 | 0.0149 | 0.0144 | 0.0148 | 0.0137 | 0.0149 | 0.0153 | 0.0156 | 0.0156 |
| IQR      | 0.0026 | 0.0033 | 0.0032 | 0.0025 | 0.0019 | 0.0021 | 0.0012 | 0.0023 | 0.0025 | 0.0028 | 0.0035 |
